# Supplementary material for: Enhancing the adsorption behavior and mechanism of Sr(ii) by functionalized montmorillonite with different 3-aminopropyltriethoxysilane (APTES) ratios
Source: Royal Society of Chemistry journal article supplement (doi:10.1039/c6ra19362e), 2016-01-01
Supplement: c6ra19362e1.pdf [file c6ra19362e1.pdf]

## Supporting information

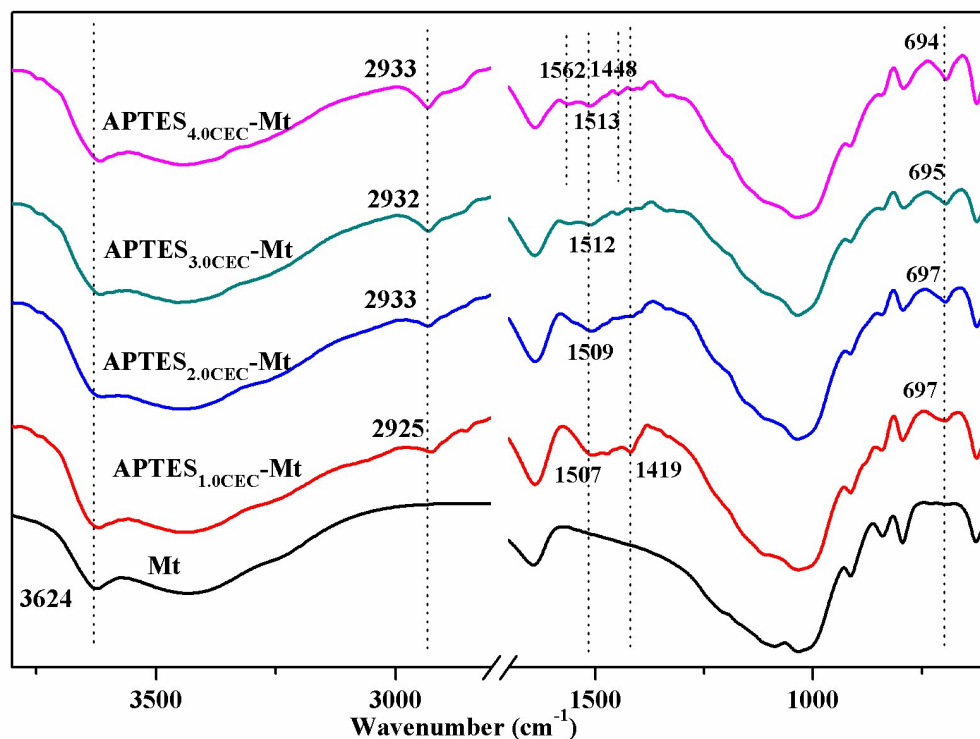

Fig. S1 Infrared spectra of Mt and APTES-Mts

Table S1 Point of zero charge and structural data of Mt and APTES-Mts

( $S_{\text{ext}}$ =external surface area,  $D_a$ =average pore diameter,  $V_t$ =total porous volume,  $V_{\text{micro}}$ =microporous volume).

| Samples                     | pH <sub>zpc</sub> | S <sub>BET</sub><br>(m <sup>2</sup> /g) | S <sub>ext</sub><br>(m <sup>2</sup> /g) | D <sub>a</sub><br>(nm) | V <sub>micro</sub> (cm <sup>3</sup> /<br>g) | V <sub>t</sub><br>(cm <sup>3</sup> /g) |
|-----------------------------|-------------------|-----------------------------------------|-----------------------------------------|------------------------|---------------------------------------------|----------------------------------------|
| Mt                          | <1.0              | 71.15                                   | 51.90                                   | 13.629                 | 0.00844                                     | 0.141403                               |
| APTES <sub>1.0CEC</sub> -Mt | 2.2               | 81.54                                   | 33.62                                   | 196.22                 | 0.02198                                     | 0.105614                               |
| APTES <sub>2.0CEC</sub> -Mt | 6.0               | 16.48                                   | 14.17                                   | 290.56                 | 0.00078                                     | 0.065644                               |
| APTES <sub>3.0CEC</sub> -Mt | 7.8               | 17.59                                   | 15.07                                   | 264.43                 | 0.00084                                     | 0.064276                               |
| APTES <sub>4.0CEC</sub> -Mt | 8.3               | 11.91                                   | 9.94                                    | 341.42                 | 0.00067                                     | 0.052098                               |
